# Supplementary material for: A super stretchable and sensitive strain sensor based on a carbon nanocoil network fabricated by a simple peeling-off approach
Source: Royal Society of Chemistry journal article supplement (doi:10.1039/c7nr05486f), 2017-01-01
Supplement: c7nr05486f1.pdf [file c7nr05486f1.pdf]

## Supporting Information

### A super stretchable and sensitive strain sensor based on carbon nanocoil network fabricated by a simple peeling off approach

Chenghao Deng<sup>1</sup>, Lujun Pan<sup>1\*</sup>, Dongmei Zhang<sup>1#</sup>, Chengwei Li<sup>1#</sup>, and Habib Nasir<sup>2</sup>

<sup>1</sup>School of Physics, Dalian University of Technology, No. 2 Linggong Road, Ganjingzi District,

Dalian 116024, PR China

<sup>2</sup>School of Natural Sciences, National University of Sciences and Technology, H-12 Sector,

Islamabad, Pakistan

#### 1. TEM image of a typical CNC.

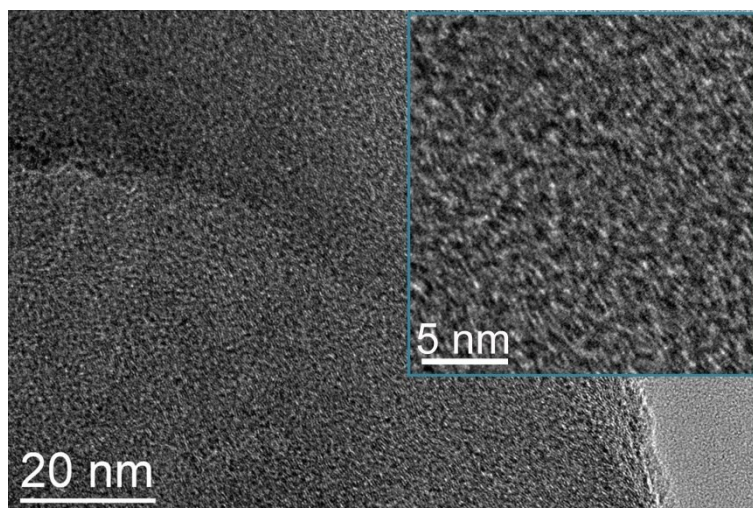

Figure S1. TEM image of a typical CNC.

#### 2. Resistance response to tension of sensor 2.

---

\* Corresponding author E-mail: [lpan@dlut.edu.cn](mailto:lpan@dlut.edu.cn)

# Equal contribution author

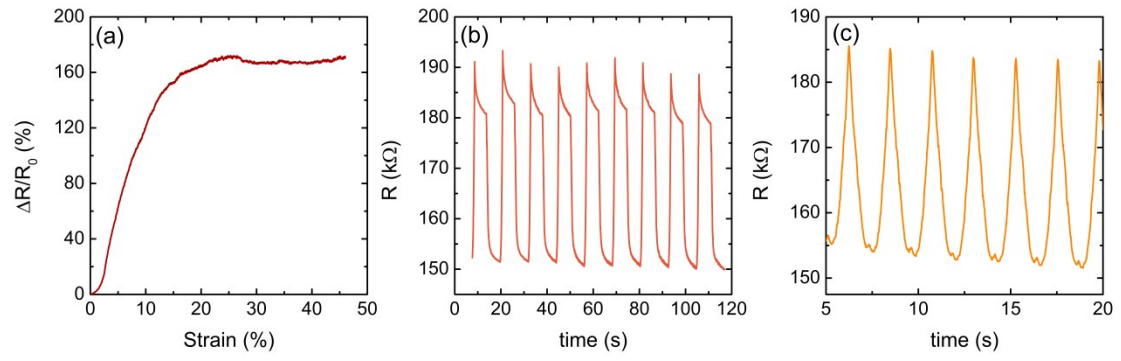

Figure S2. Resistance response to tension of sensor 2. (a) Resistance change under different strain degree. (b) and (c) are the results of cyclic tension tests for sensor 2.
